# Supplementary material for: D-dimer levels and characteristics of lymphocyte subsets, cytokine profiles in peripheral blood of patients with severe COVID-19: A systematic review and meta-analysis
Source: Frontiers journal article supplement (doi:10.3389/fmed.2022.988666), 2022-10-05

Supplement 3

(A)Forest plot between nonsevere and severe groups for levels of IL-2.

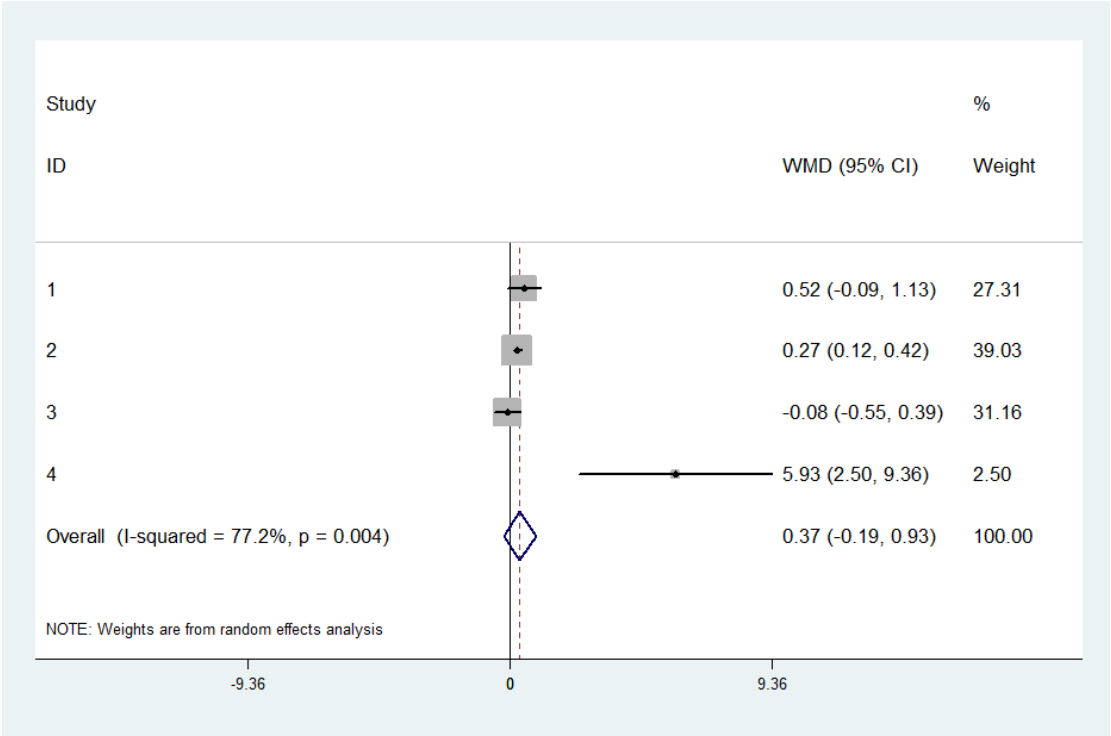

(B)Forest plot between nonsevere and severe groups for levels of IL-4.

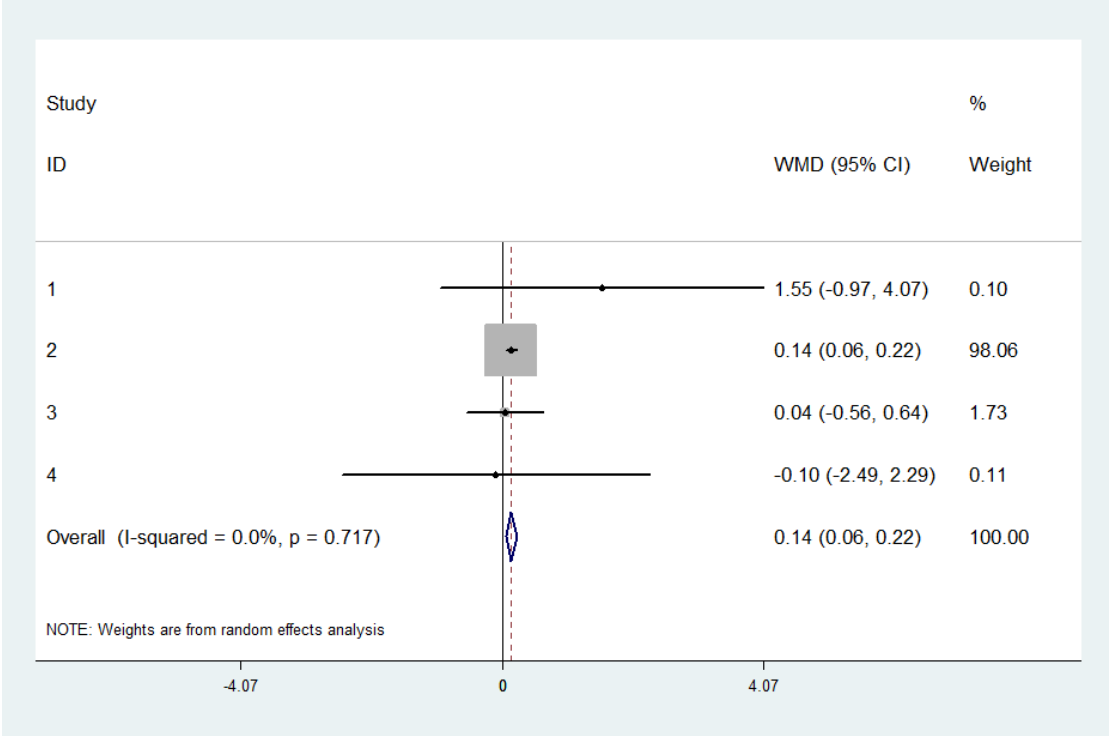

(C)Forest plot between nonsevere and severe groups for levels of IL-10.

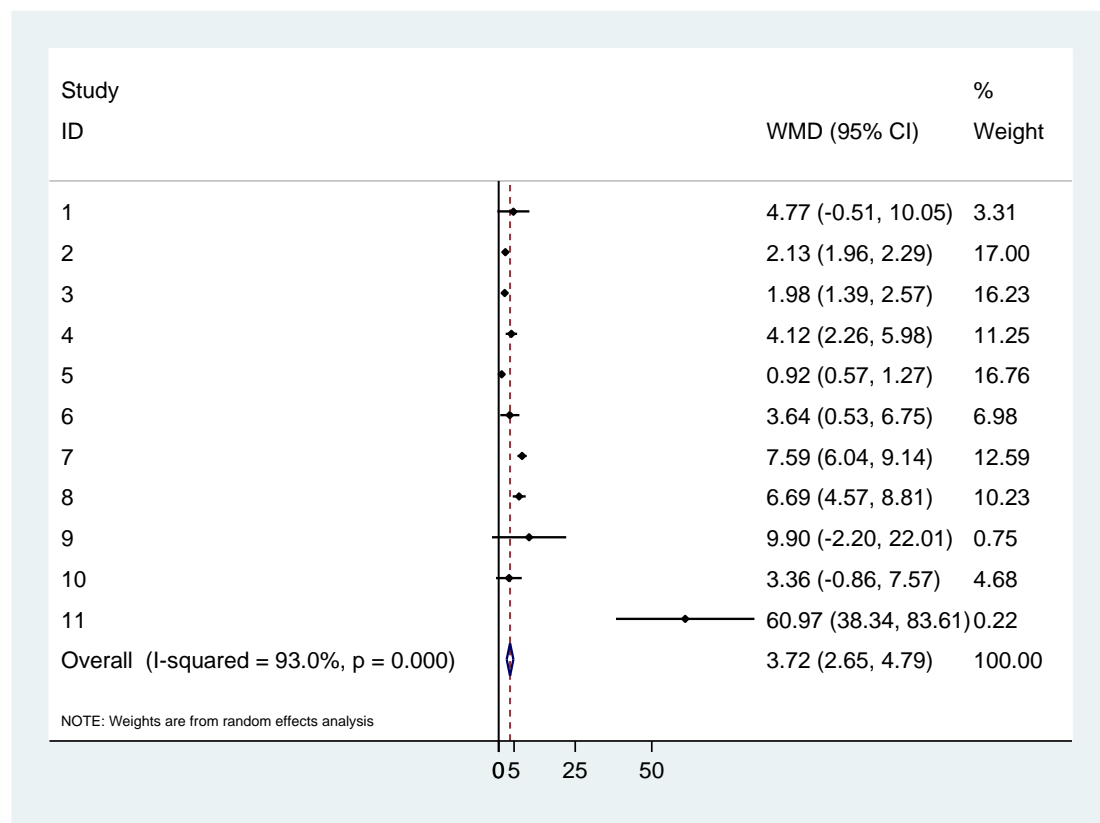

(D)Sensitivity analyses between nonsevere and severe groups for levels of IL-2.

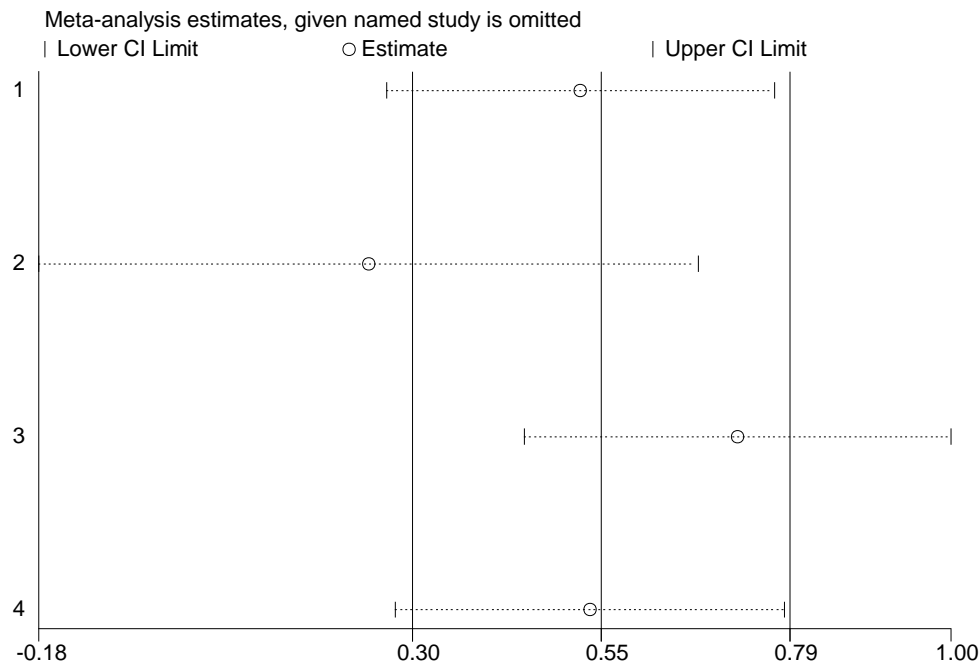

(E)Sensitivity analyses between nonsevere and severe groups for levels of IL-4.

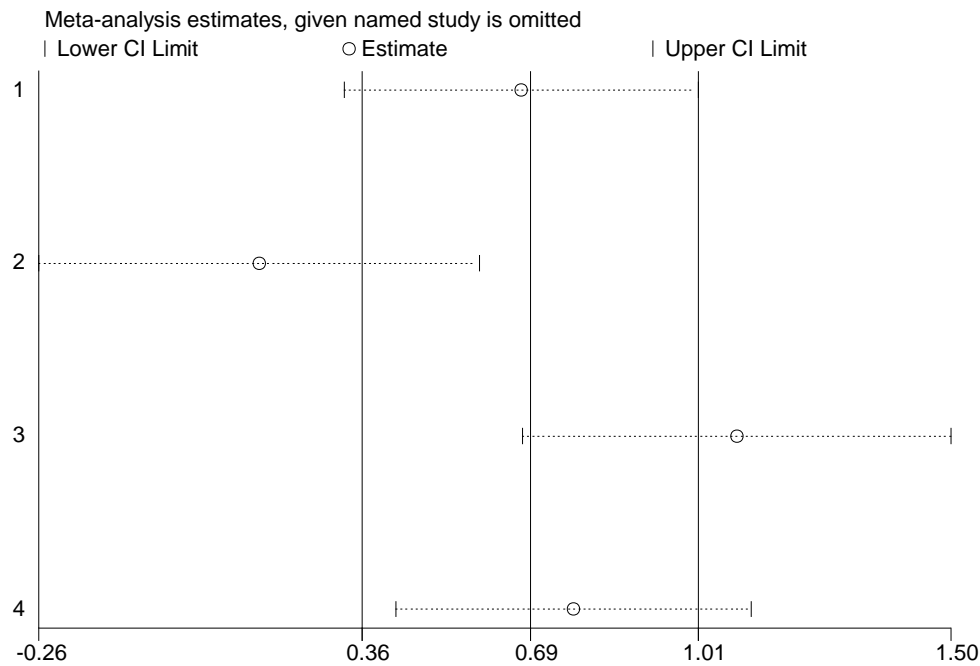

(F)Sensitivity analyses between nonsevere and severe groups for levels of IL-6.

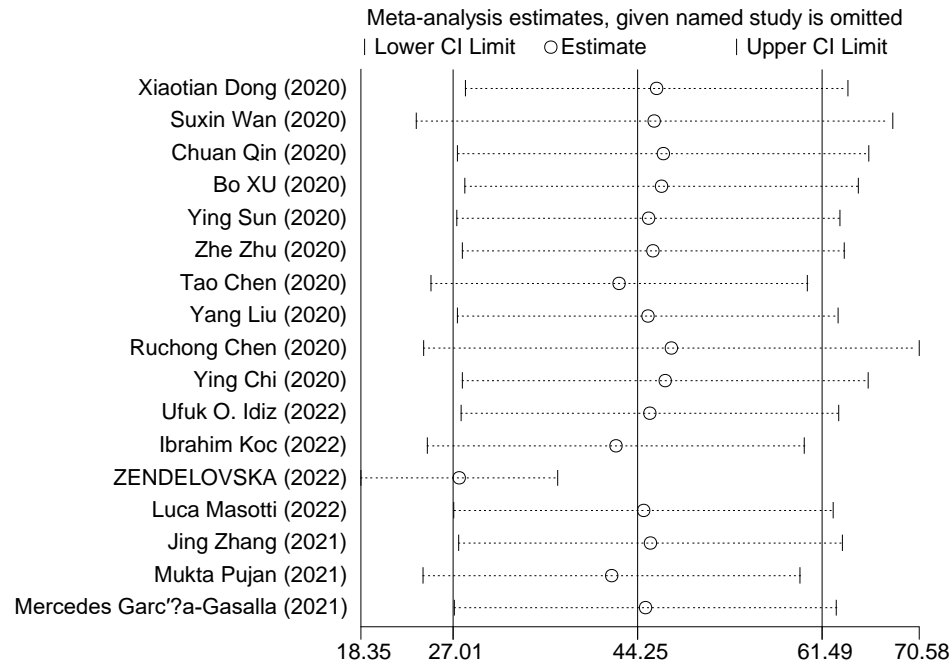

(G)Sensitivity analyses between nonsevere and severe groups for levels of IL-10.

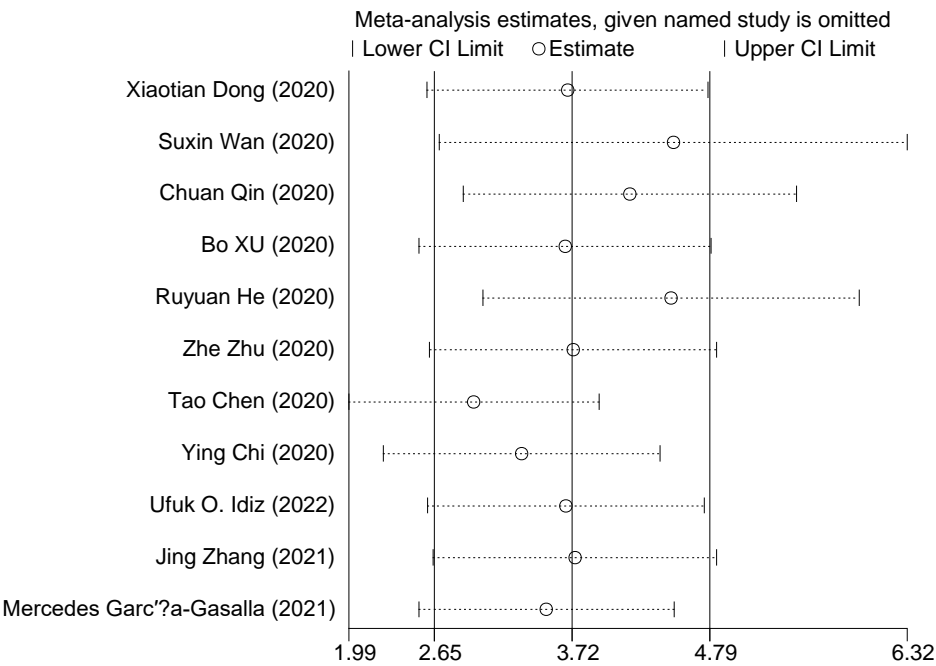

(H)Publication bias by Egger' test between nonsevere and severe groups in IL-6.

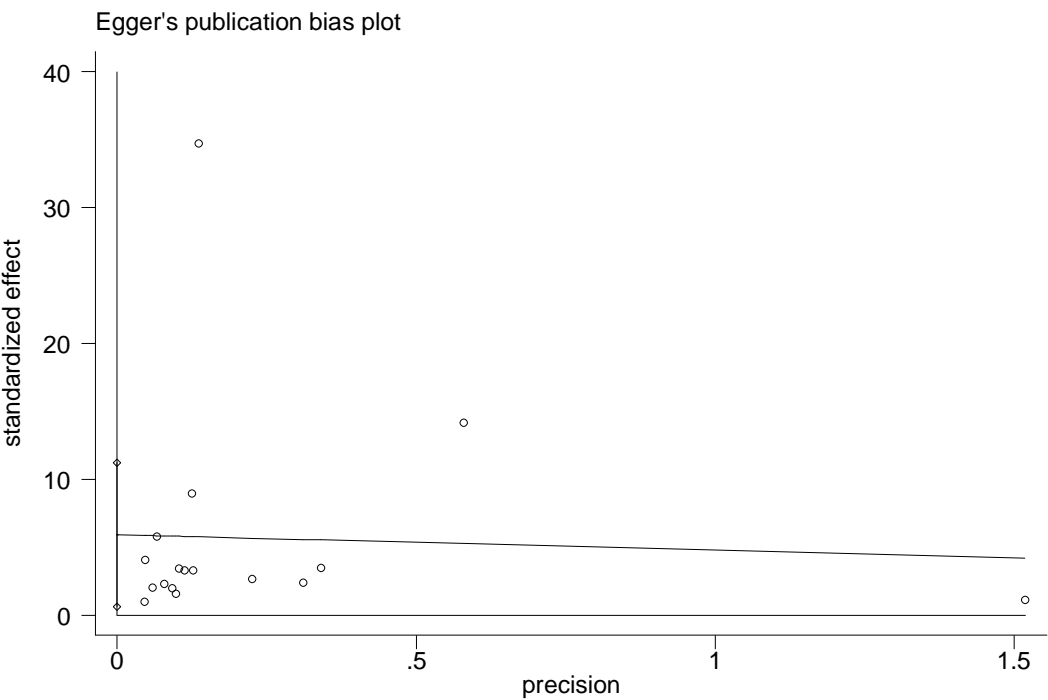

**(I)Publication bias by Egger' test between nonsevere and severe groups in IL-10.**

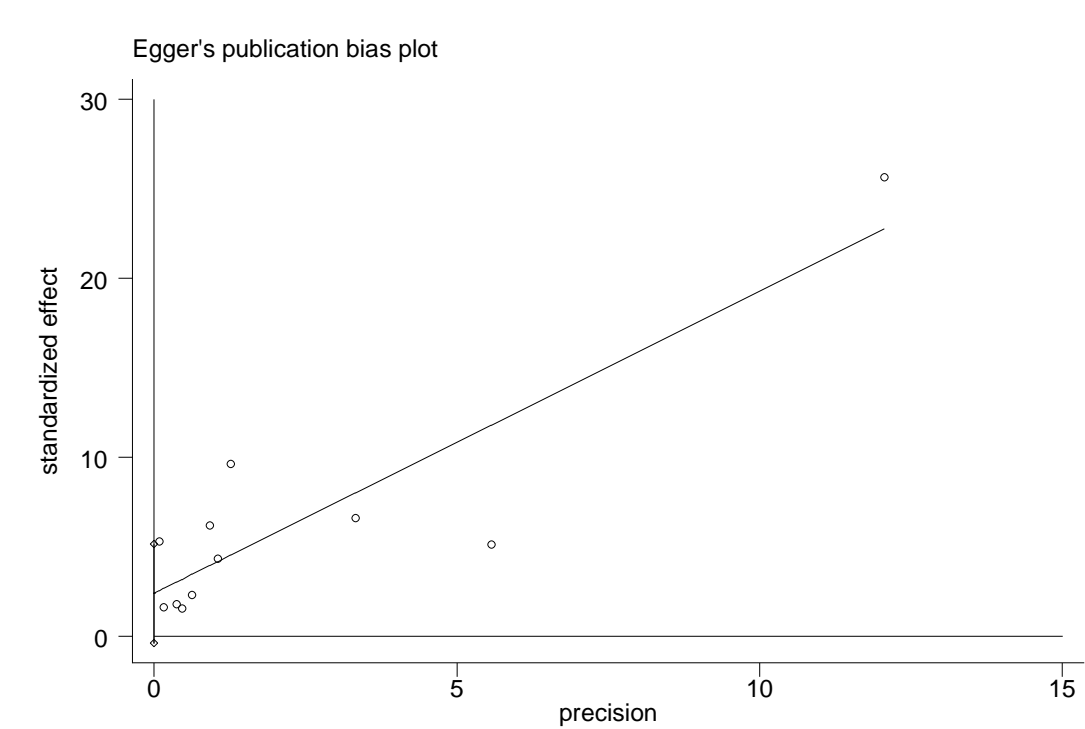

**(J)Funnel plot by trim-and-fill method between nonsevere and severe groups in IL-6.**

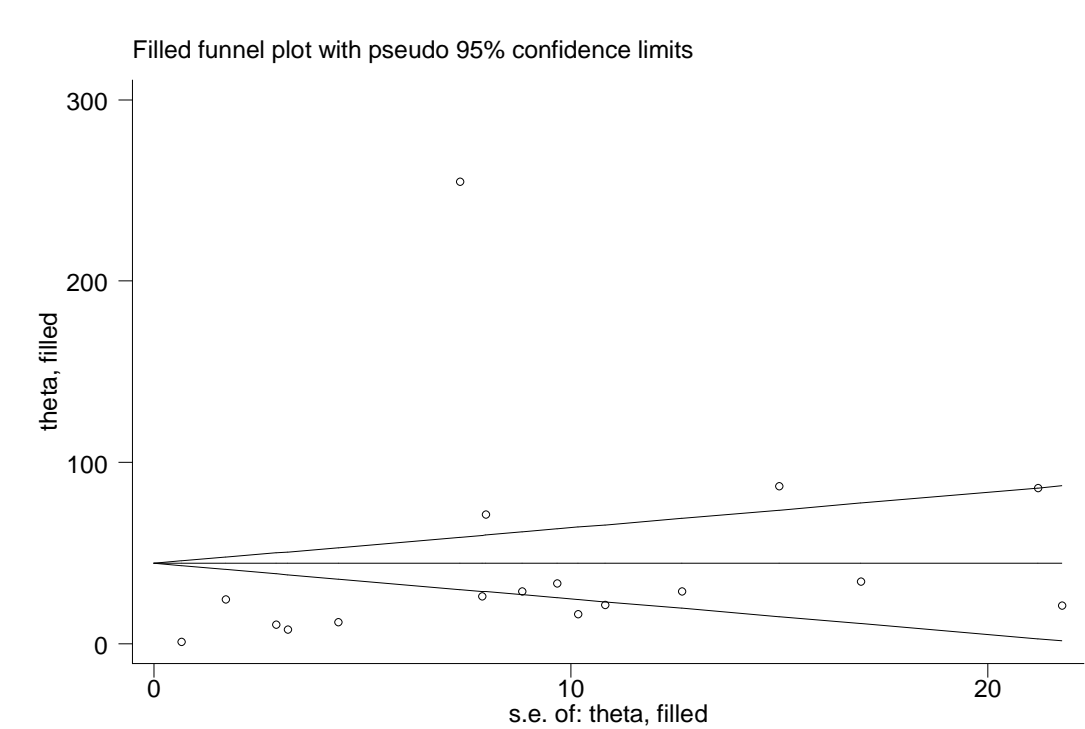

Supplement: Data_Sheet_3.pdf [file Data_Sheet_3.pdf]
